# Supplementary material for: The Relationship between Functional Health Literacy, Self-Rated Health, and Social Support between Younger and Older Adults in Ghana
Source: PubMed Central journal article supplement (PMC6747074; doi:10.3390/ijerph16173188), 2019-08-31
Supplement: ijerph-16-03188-s001.pdf [file ijerph-16-03188-s001.pdf]

**Supplementary Table S1: Spearman's correlation analysis of variables in the study.**

|     |                              | 1        | 2       | 3        | 4        | 5        | 6        | 7       | 8        | 9       | 10      | 11      | 12       | 13   |
|-----|------------------------------|----------|---------|----------|----------|----------|----------|---------|----------|---------|---------|---------|----------|------|
| 1.  | Health status                | 1.000    |         |          |          |          |          |         |          |         |         |         |          |      |
| 2.  | Information support          | 0.128*   | 1.000   |          |          |          |          |         |          |         |         |         |          |      |
| 3.  | Instrumental support         | -0.083   | 0.513** | 1.000    |          |          |          |         |          |         |         |         |          |      |
| 4.  | Emotional support            | 0.102*   | 0.389** | .460**   | 1.000    |          |          |         |          |         |         |         |          |      |
| 5.  | Health literacy              | 0.168**  | 0.439** | 0.491**  | 0.406**  | 1.000    |          |         |          |         |         |         |          |      |
| 6.  | Age                          | -0.140** | 0.460** | 0.482**  | 0.429**  | -0.704** | 1.000    |         |          |         |         |         |          |      |
| 7.  | Sex                          | -0.018   | -0.028  | 0.036    | 0.085    | 0.091*   | -0.057   | 1.000   |          |         |         |         |          |      |
| 8.  | Locality (Rural)             | -0.060   | 0.016   | -0.091*  | 0.087*   | -0.096*  | 0.063    | 0.179** | 1.000    |         |         |         |          |      |
| 9.  | Marital status               | 0.193**  | 0.473** | 0.453**  | 0.400**  | 0.777**  | -0.757** | 0.064   | 0.057    | 1.000   |         |         |          |      |
| 10. | Education                    | 0.048    | 0.247** | -0.264** | -0.210** | 0.175**  | -0.394** | -0.080  | -0.201** | 0.333** | 1.000   |         |          |      |
| 11. | Income                       | 0.225**  | 0.443** | 0.470**  | 0.350**  | 0.768**  | -0.648** | 0.090   | 0.039    | 0.682** | 0.450** | 1.000   |          |      |
| 12. | Employment status (employed) | 0.059    | 0.370** | 0.368**  | 0.285**  | 0.608**  | 0.657**  | 0.085   | 0.050    | 0.623** | 0.253** | 0.415** | 1.000    |      |
| 13. | Year of data collection      | -0.101*  | 0.051   | 0.059    | 0.066    | 0.025    | 0.045    | -0.009  | 0.173**  | -0.028  | -0.068  | -0.053  | -0.111** | 1.00 |

\*\*Significant at the 0.01 level (2-tailed), \*Significant at the 0.05 level (2-tailed)

**Supplementary Table S2: Descriptive statistics of first data (June to October 2015)**

|                                         | Young and emerging adults<br>18-29 years, N= 255 |      | Older adults<br>50+ years, N = 162 |      | <i>p-value</i> | Overall<br>(N=417) |
|-----------------------------------------|--------------------------------------------------|------|------------------------------------|------|----------------|--------------------|
|                                         | Frequency                                        | %    | Frequency                          | %    |                | N (%)              |
| <b>Sex</b>                              |                                                  |      |                                    |      | <b>0.042</b>   |                    |
| Male                                    | 114                                              | 44.7 | 79                                 | 48.8 |                | 193 (46.3)         |
| Female                                  | 141                                              | 55.3 | 83                                 | 51.2 |                | 224 (53.7)         |
| <b>Context/People</b>                   |                                                  |      |                                    |      | 0.841          |                    |
| Rural                                   | 121                                              | 47.5 | 77                                 | 47.5 |                | 198 (47.7)         |
| Urban                                   | 134                                              | 52.5 | 85                                 | 52.5 |                | 219 (52.3)         |
| <b>Educational Attainment</b>           |                                                  |      |                                    |      | <b>0.001</b>   |                    |
| Never been to school                    | 2                                                | 0.8  | 83                                 | 51.2 |                | 85                 |
| Basic education<br>(Junior high school) | 121                                              | 47.5 | 52                                 | 32.1 |                | 173                |
| Senior High School<br>(SHS)             | 113                                              | 44.3 | 19                                 | 11.7 |                | 128                |
| Tertiary Level                          | 19                                               | 7.5  | 8                                  | 4.9  |                | 25                 |
| <b>Marital Status</b>                   |                                                  |      |                                    |      | <b>0.001</b>   |                    |
| Married                                 | 50                                               | 19.6 | 85                                 | 52.5 |                | 135 (32.4)         |
| Unmarried                               | 205                                              | 80.4 | 77                                 | 47.5 |                | 282 (67.6)         |
| <b>Employment Status</b>                |                                                  |      |                                    |      | 0.616          |                    |
| Employed                                | 134                                              | 52.5 | 84                                 | 51.9 |                | 218 (52.3)         |
| Unemployed                              | 121                                              | 47.5 | 78                                 | 48.1 |                | 199 (47.7)         |
| <b>Monthly Income <sup>c</sup></b>      |                                                  |      |                                    |      | <b>0.001</b>   |                    |
| <200 GH¢                                | 73                                               | 51.0 | 98                                 | 70.0 |                | 171 (60.4)         |
| 200-500 GH¢                             | 39                                               | 27.7 | 18                                 | 12.9 |                | 57 (20.1)          |
| 500-1000 GH¢                            | 24                                               | 16.8 | 16                                 | 11.4 |                | 40 (14.1)          |
| 1000+ GH¢                               | 7                                                | 4.9  | 8                                  | 5.7  |                | 15 (5.3)           |
| <b>Informational support</b>            |                                                  |      |                                    |      | .0911          |                    |
| No                                      | 66                                               | 25.9 | 46                                 | 28.4 |                | 112 (26.5)         |
| Yes                                     | 189                                              | 74.1 | 116                                | 71.6 |                | 305 (73.1)         |
| <b>Instrumental support</b>             |                                                  |      |                                    |      | 0.997          |                    |
| No                                      | 63                                               | 24.7 | 41                                 | 25.3 |                | 104 (24.9)         |
| Yes                                     | 192                                              | 75.3 | 121                                | 74.7 |                | 313 (75.6)         |
| <b>Emotional support</b>                |                                                  |      |                                    |      | <b>0.036</b>   |                    |
| No                                      | 55                                               | 21.6 | 49                                 | 30.2 |                | 104 (24.9)         |
| Yes                                     | 200                                              | 78.4 | 113                                | 69.8 |                | 313 (75.6)         |
| <b>Health literacy</b>                  |                                                  |      |                                    |      | <b>0.001</b>   |                    |
| Sufficient HL                           | 104                                              | 40.8 | 45                                 | 27.8 |                | 149 (46.9)         |
| Problematic HL                          | 92                                               | 36.1 | 34                                 | 21.0 |                | 126 (30.2)         |
| Inadequate HL                           | 59                                               | 23.1 | 83                                 | 51.2 |                | 144 (34.5)         |
| <b>Health status</b>                    |                                                  |      |                                    |      | <b>0.001</b>   |                    |
| Good                                    | 188                                              | 73.7 | 61                                 | 37.7 |                | 249 (59.7)         |
| Poor                                    | 66                                               | 26.3 | 101                                | 62.3 |                | 167 (40.3)         |

Supplementary Table S3: Descriptive statistics of second data (January to July 2017).

|                                         | Young and emerging adults<br>18-29 years, N= 63 |      | Older adults<br>50+ years, N = 41 |      | <i>p-value</i> | Overall<br>(N=104) |
|-----------------------------------------|-------------------------------------------------|------|-----------------------------------|------|----------------|--------------------|
|                                         | Frequency                                       | %    | Frequency                         | %    |                | N (%)              |
| <b>Sex</b>                              |                                                 |      |                                   |      | 0.108          |                    |
| Male                                    | 27                                              | 42.9 | 21                                | 51.2 |                | 48 (46.2)          |
| Female                                  | 36                                              | 57.1 | 20                                | 48.8 |                | 56 (53.8)          |
| <b>Context/People</b>                   |                                                 |      |                                   |      | 0.428          |                    |
| Rural                                   | 23                                              | 36.5 | 19                                | 46.3 |                | 42(40.4)           |
| Urban                                   | 40                                              | 63.5 | 22                                | 53.7 |                | 62(59.6)           |
| <b>Educational Attainment</b>           |                                                 |      |                                   |      | <b>0.001</b>   |                    |
| Never been to school                    | 0                                               | 0    | 19                                | 46.3 |                | 19(18.3)           |
| Basic education<br>(Junior high school) | 31                                              | 49.2 | 11                                | 26.8 |                | 42(40.3)           |
| Senior High School<br>(SHS)             | 27                                              | 42.9 | 8                                 | 19.6 |                | 35(33.7)           |
| Tertiary Level                          | 5                                               | 7.9  | 3                                 | 7.3  |                | 8(7.7)             |
| <b>Marital Status</b>                   |                                                 |      |                                   |      | <b>0.001</b>   |                    |
| Married                                 | 14                                              | 22.2 | 19                                | 46.3 |                | 33 (31.7)          |
| Unmarried                               | 49                                              | 77.8 | 22                                | 53.7 |                | 71(68.3)           |
| <b>Employment Status</b>                |                                                 |      |                                   |      | 0.999          | ()                 |
| Employed                                | 31                                              | 49.2 | 20                                | 48.8 |                | 51(49.0)           |
| Unemployed                              | 32                                              | 50.8 | 21                                | 51.2 |                | 53(51.0)           |
| <b>Monthly Income <sup>c</sup></b>      |                                                 |      |                                   |      | <b>0.008</b>   |                    |
| <200 GH¢                                | 21                                              | 56.8 | 15                                | 44.1 |                | 36(50.1)           |
| 200-500 GH¢                             | 9                                               | 24.3 | 8                                 | 23.5 |                | 17(23.9)           |
| 500-1000 GH¢                            | 5                                               | 13.5 | 7                                 | 20.6 |                | 12(16.9)           |
| 1000+ GH¢                               | 2                                               | 5.4  | 4                                 | 11.8 |                | 6(8.5)             |
| <b>Informational support</b>            |                                                 |      |                                   |      | 0.648          |                    |
| No                                      | 15                                              | 23.8 | 12                                | 29.3 |                | 27(26.0)           |
| Yes                                     | 48                                              | 76.2 | 29                                | 70.7 |                | 77(74.0)           |
| <b>Instrumental support</b>             |                                                 |      |                                   |      | 0.867          |                    |
| No                                      | 15                                              | 23.8 | 13                                | 31.7 |                | 28(26.9)           |
| Yes                                     | 48                                              | 76.2 | 28                                | 68.3 |                | 76(73.1)           |
| <b>Emotional support</b>                |                                                 |      |                                   |      | 0.141          |                    |
| No                                      | 16                                              | 25.4 | 16                                | 39.0 |                | 32(30.8)           |
| Yes                                     | 47                                              | 74.6 | 25                                | 61.0 |                | 72(69.2)           |
| <b>Health literacy</b>                  |                                                 |      |                                   |      | <b>0.001</b>   |                    |
| Sufficient HL                           | 33                                              | 52.4 | 12                                | 29.3 |                | 45(43.3)           |
| Problematic HL                          | 21                                              | 33.3 | 10                                | 24.4 |                | 31(29.8)           |
| Inadequate HL                           | 9                                               | 14.3 | 19                                | 46.3 |                | 28(26.3)           |
| <b>Health status</b>                    |                                                 |      |                                   |      | <b>0.001</b>   |                    |
| Good                                    | 49                                              | 77.8 | 15                                | 36.6 |                | 64(61.5)           |
| Poor                                    | 14                                              | 22.2 | 26                                | 63.7 |                | 40(38.5)           |
